# Supplementary material for: Interleukin-22 suppresses major histocompatibility complex II in mucosal epithelial cells
Source: PubMed Central journal article supplement (PMC10494524; doi:10.1084/jem.20230106), 2023-09-11

Source Data  
Supplementary Figure  
2G

**G**

*Wild-type Intestinal Organoids*

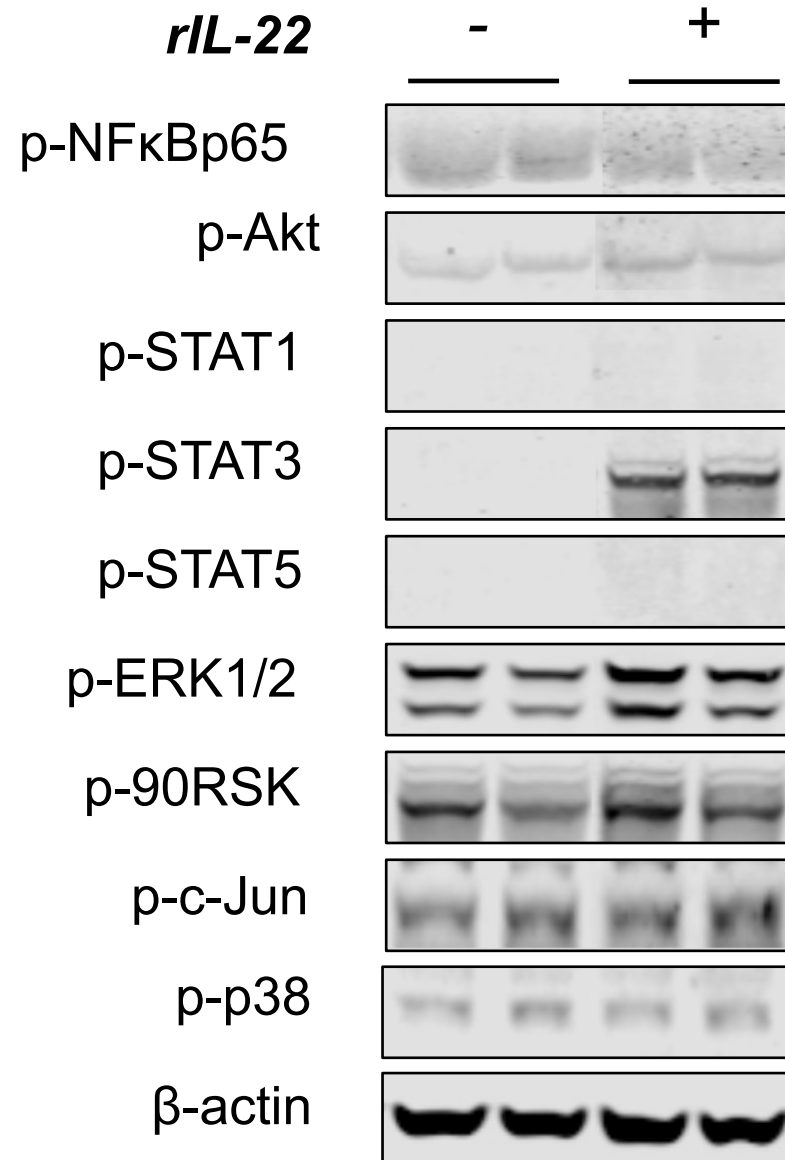

# p-STAT5, p-NFkBp65, p-p38

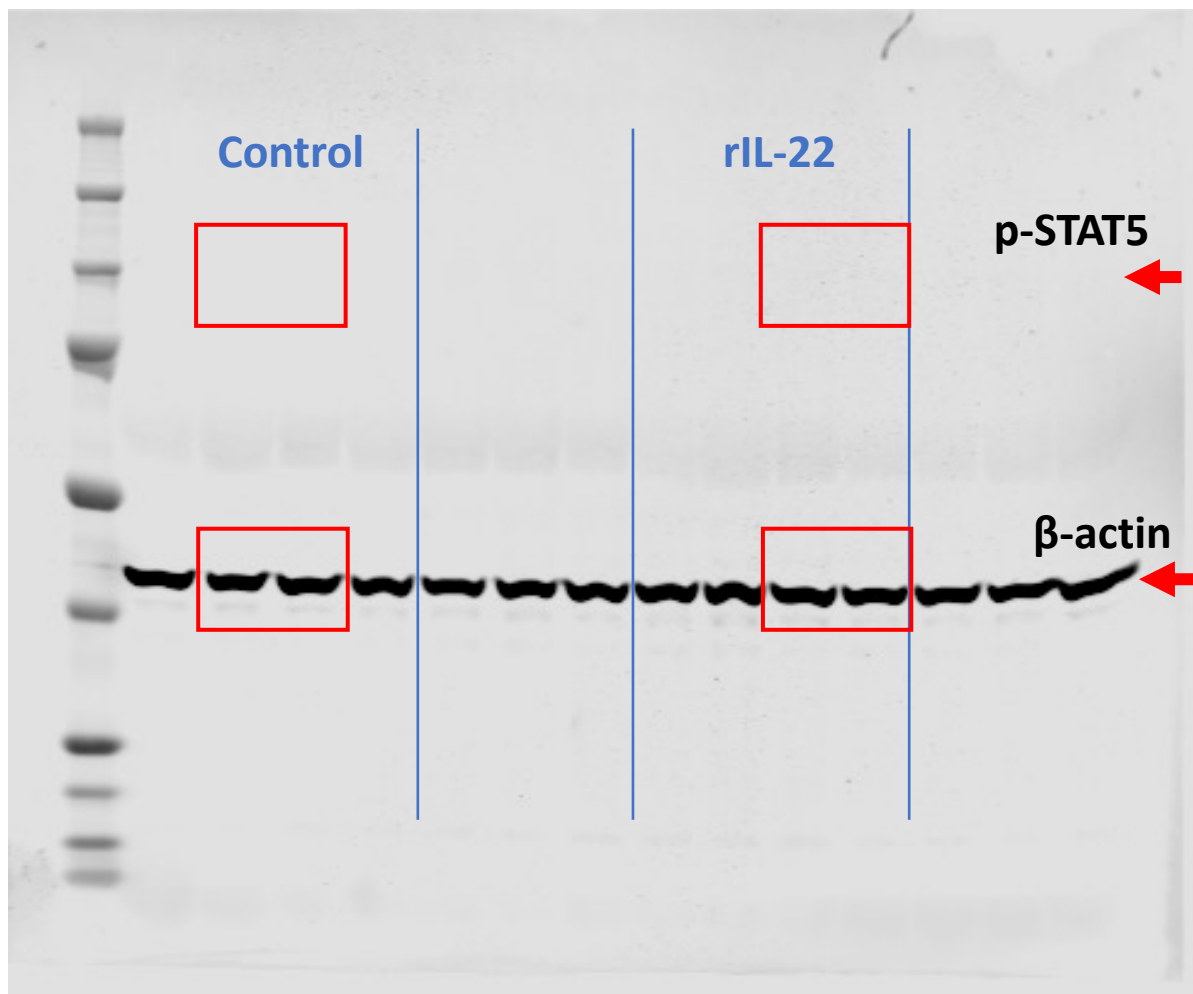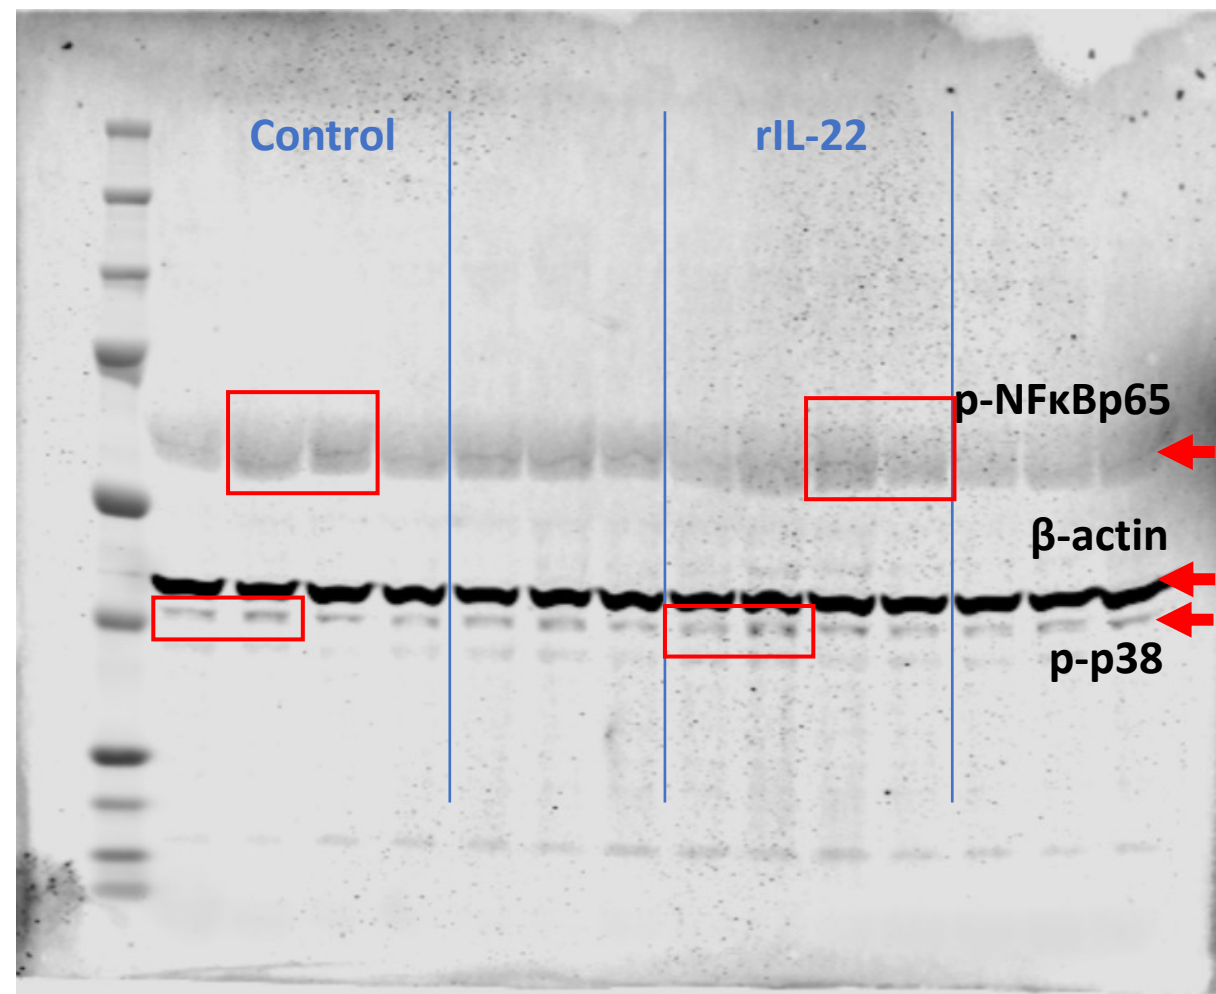

# p-90RSK, p-c-jun

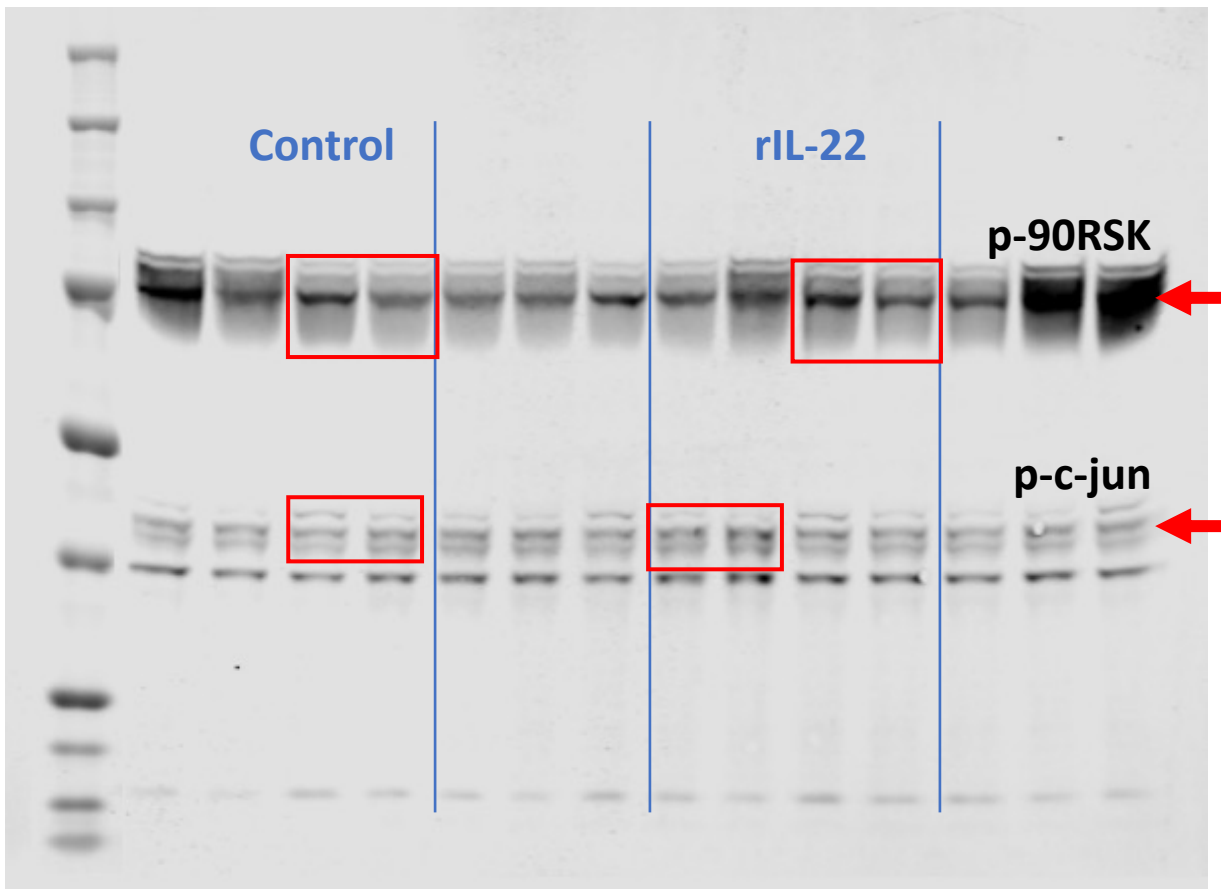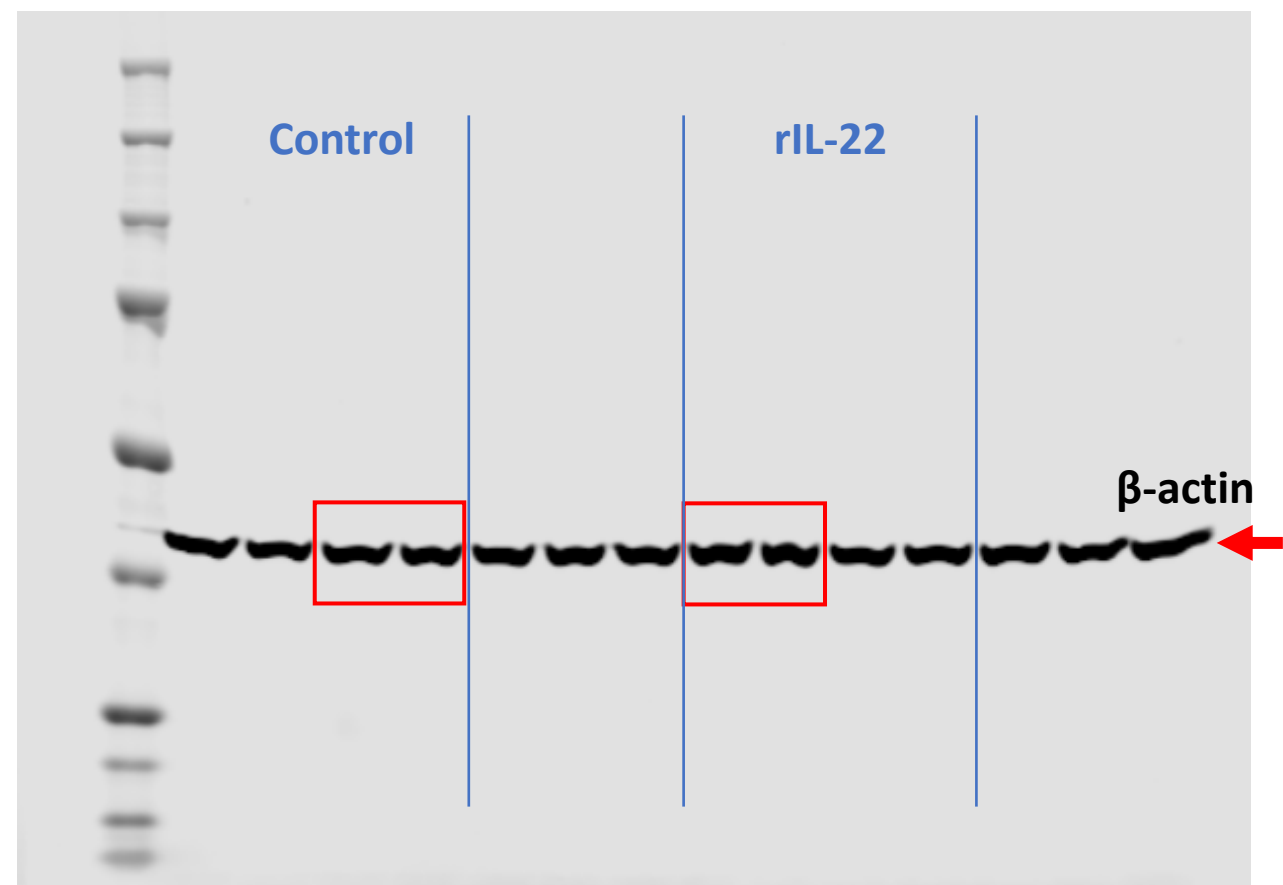

# p-STAT1

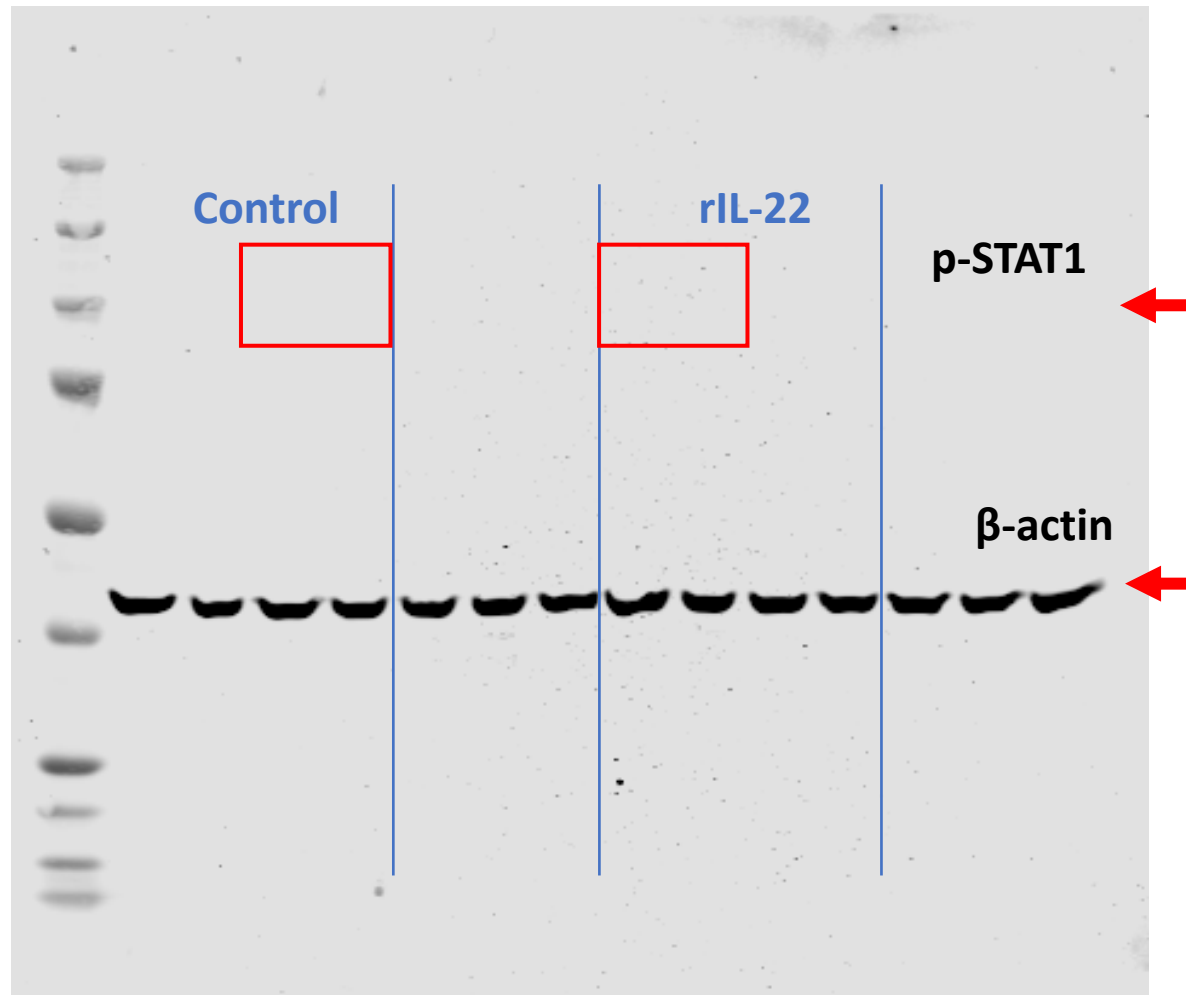

Supplement: JEM_20230106_SourceDataFS2.pdf [file JEM_20230106_SourceDataFS2.pdf]
